# Supplementary material
Source: PubMed Central journal article supplement (PMC6954459)
Supplement: jnm226472SupplementaryData.pdf [file jnm226472SupplementaryData.pdf]

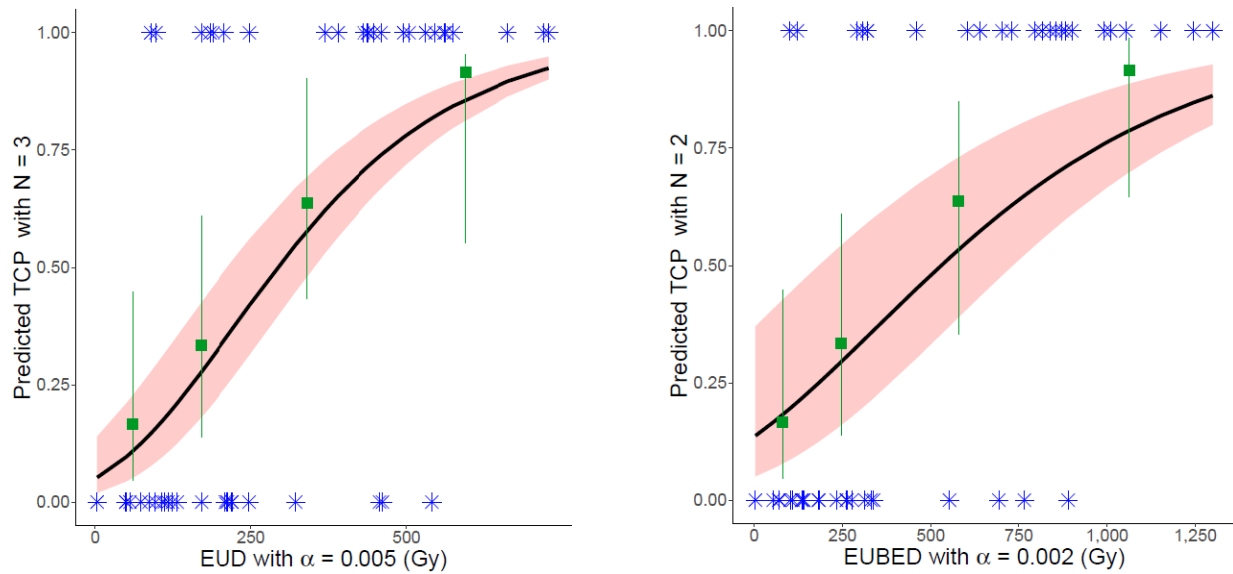

Supplemental Figure 1. TCP predictions (black curves) from the cell survival model fit compared to observed response proportions (green squares) by dose quartiles. EUD metrics correspond to the  $\alpha$  and N that gave the best fit (Supplemental Table 7). The blue asterisk indicates the observed binary response for each lesion. The red shaded region shows the 95% CI for the model and the green lines indicate the 95% score-based CIs for the observations. Comparison with Fig. 3 of the main text demonstrate the superior performance of the logit model compared with this model.

Supplemental Table 1. Patient/lesion characteristics of the entire cohort and sub-cohort with mRECIST response.

|                                                                                  | Total cohort          | Sub-cohort with mRECIST response |
|----------------------------------------------------------------------------------|-----------------------|----------------------------------|
| Disease                                                                          |                       |                                  |
| Primary                                                                          | 9 (41%) <sup>a</sup>  | 7 (58%) <sup>b</sup>             |
| Liver Metastasis                                                                 | 13 (59%) <sup>c</sup> | 5 (42%) <sup>d</sup>             |
| Total Patients                                                                   | 22                    | 12                               |
| Total Therapies                                                                  | 28                    | 14                               |
| Number of lesions                                                                |                       |                                  |
| Primary                                                                          | 31 (35%)              | 21 (50%)                         |
| Liver Metastasis                                                                 | 58 (65%)              | 21 (50%)                         |
| Total Lesions                                                                    | 89                    | 42                               |
| Cirrhotic livers                                                                 | 7 (32%) <sup>e</sup>  | 6 (50%) <sup>e</sup>             |
|                                                                                  | Median [range]        |                                  |
| Administered activity (GBq)                                                      |                       |                                  |
| Hepatocellular carcinoma                                                         | 2.5 [0.5 to 4.4]      | 1.9 [0.5 to 2.9]                 |
| Cholangiocarcinoma                                                               | 3.2 [2.1 to 4.4]      | 4.4                              |
| Liver Metastasis                                                                 | 2.9 [0.6 to 5.8]      | 3.1 [0.7 to 3.9]                 |
| Specific activity of microspheres at administration (Bq/sphere)                  | 866 [144 to 1456]     | 887 [182 to 1191]                |
| Lesion volume (mL)                                                               |                       |                                  |
| Hepatocellular carcinoma                                                         | 11.7 [2.3 to 57.7]    | 5.5 [2.3 to 53.6]                |
| Cholangiocarcinoma                                                               | 8.7 [4.0 to 130.8]    | 7.4 [4.0 to 130.8]               |
| Liver Metastasis                                                                 | 9.3 [2.2 to 827.8]    | 8.1 [2.2 to 827.8]               |
| Number of lesions per patient                                                    | 3 [1 to 5]            | 3 [1 to 5]                       |
| Elapsed time between microsphere administration and <sup>90</sup> Y PET/CT (min) | 153, [44 to 230]      | 138 [44 to 191]                  |
| Elapsed time between <sup>90</sup> Y treatment and first follow-up (weeks)       | 11 [5 to 23]          | 13 [6 to 23]                     |

<sup>a</sup>Includes hepatocellular carcinoma (7), cholangiocarcinoma (2)

<sup>b</sup>Includes hepatocellular carcinoma (6), cholangiocarcinoma (1)

<sup>c</sup>Includes neuroendocrine(5), colorectal(2), colon (2), pheochromocytoma (1), anal(1) and adrenal(2) disease.

<sup>d</sup>Includes neuroendocrine (3), pheochromocytoma (1), and adrenal (1) disease.

<sup>e</sup>All cases correspond to hepatocellular carcinoma

Supplemental Table 2. Summary of dose metrics and dose – shrinkage model R<sup>2</sup> values (with 95% CI) for the full dataset and the subset of lesions with mRECIST assessment. The ADxx, BEDxx and Vxx values presented are those that provided the best shrinkage model fit.

| Metric              | All lesions (N=89)        |                                                   |          | Subset of lesions with mRECIST (N=42) |                           |                                                |          |
|---------------------|---------------------------|---------------------------------------------------|----------|---------------------------------------|---------------------------|------------------------------------------------|----------|
|                     | Median, Mean<br>[Min,Max] | Dose - shrinkage model R <sup>2</sup><br>(95% CI) | p-value* | Response                              | Median, Mean<br>[Min,Max] | Dose - shrinkage model R <sup>2</sup> (95% CI) | p-value* |
| <b>AD (Gy)</b>      | 268, 359<br>[1, 1271]     | RECIST: 0.074 (0.010, 0.194)                      | 0.007    | RECIST                                | 270, 398<br>[2, 1271]     | 0.338 (0.137, 0.572)                           | 0.0001   |
|                     |                           |                                                   |          | mRECIST                               | 270, 398<br>[2, 1271]     | 0.423 (0.163, 0.622)                           | <0.0001  |
| <b>BED (Gy)</b>     | 404, 663<br>[1, 4337]     | RECIST: 0.043 (0.005, 0.100)                      | 0.038    | RECIST                                | 438, 763<br>[2, 4337]     | 0.257 (0.064, 0.408)                           | 0.001    |
|                     |                           |                                                   |          | mRECIST                               | 438, 763<br>[2, 4337]     | 0.334 (0.135, 0.584)                           | 0.0001   |
| <b>ADxx (Gy)</b>    | 449, 573<br>[2, 2727]     | RECIST: 0.089 (0.017, 0.204)<br>(AD10)            | 0.005    | RECIST                                | 439, 550<br>[3, 1835]     | 0.335 (0.139, 0.544)<br>(AD20)                 | 0.0001   |
|                     |                           |                                                   |          | mRECIST                               | 38, 475<br>[2, 1535]      | 0.409 (0.163, 0.612)<br>(AD30)                 | <0.0001  |
| <b>BEDxx (Gy)</b>   | 140, 251<br>[0, 1334]     | RECIST: 0.021 (0.0002, 0.087)<br>(BED90)          | 0.106    | RECIST                                | 145, 248<br>[1, 894]      | 0.174 (0.002, 0.419)<br>(BED90)                | 0.007    |
|                     |                           |                                                   |          | mRECIST                               | 354, 602<br>[2, 2085]     | 0.392 (0.059, 0.610)<br>(BED50)                | <0.0001  |
| <b>Vxx (AD) (%)</b> | 63, 60<br>[0, 100]        | RECIST: 0.115 (0.016, 0.272)<br>(V200)            | 0.0003   | RECIST                                | 18, 35<br>[0, 99]         | 0.273 (0.076, 0.532)<br>(V450)                 | 0.001    |
|                     |                           |                                                   |          | mRECIST                               | 14, 31<br>[0, 98]         | 0.414 (0.063, 0.606)<br>(V500)                 | <0.0001  |
| <b>Vxx(BED) (%)</b> | 75, 67<br>[0, 100]        | RECIST: 0.124 (0.013, 0.280)<br>(V200)            | 0.0002   | RECIST                                | 37, 45<br>[0, 100]        | 0.248 (0.054, 0.486)<br>(V500)                 | 0.002    |
|                     |                           |                                                   |          | mRECIST                               | 37, 45<br>[0, 100]        | 0.403 (0.108, 0.582)<br>(V500)                 | <0.0001  |

\*p-value of dose metric from linear mixed model of shrinkage.

Supplemental Table 3. Dose-shrinkage (mRECIST) models for primary and metastatic lesions with AD metrics as covariates. Results for RECIST are not shown, but similar to mRECIST the slopes and intercepts of the models for the 2 groups were not significantly different. Coefficients for each group come from fully interacted linear models of the form:

$$\widehat{Shrinkage}_{ij} = \beta_{0g} + b_{0g} + \beta_{1g} * Dose_{ij} + b_{1g} * Dose_{ij} + \epsilon_{ij}, i = 1, \dots, n, j = 1, \dots, n_i, g = 1, 2$$

Where  $\beta_{0g} = \begin{cases} \beta_{01}, & \text{if metastatic lesion} \\ \beta_{02}, & \text{if primary lesion} \end{cases}$  and  $\beta_{1g} = \begin{cases} \beta_{11}, & \text{if metastatic lesion} \\ \beta_{12}, & \text{if primary lesion} \end{cases}$  and  $b_{0g}$  = random intercept and  $b_{1g}$  = random slope. So, there is a different slope and intercept depending on whether lesion is primary or metastatic.

| Dose Metric                            | Group   | Coefficient | Estimate (SE)   | p-value for dose - shrinkage | p-value for whether intercepts differ | p-value for whether slopes differ |
|----------------------------------------|---------|-------------|-----------------|------------------------------|---------------------------------------|-----------------------------------|
| <b>EUD, <math>\alpha=0.0002</math></b> | Primary | Intercept   | 8.080 (13.714)  | 0.567                        | 0.960                                 | 0.726                             |
|                                        |         | Slope       | 0.073 (0.034)   | 0.043                        |                                       |                                   |
|                                        | Mets    | Intercept   | 8.938 (9.422)   | 0.362                        |                                       |                                   |
|                                        |         | Slope       | 0.087 (0.017)   | <0.0001                      |                                       |                                   |
| <b>V500</b>                            | Primary | Intercept   | 18.549 (9.426)  | 0.073                        | 0.763                                 | 0.131                             |
|                                        |         | Slope       | 0.518 (0.209)   | 0.020                        |                                       |                                   |
|                                        | Mets    | Intercept   | 14.293 (10.113) | 0.183                        |                                       |                                   |
|                                        |         | Slope       | 0.967 (0.197)   | <0.0001                      |                                       |                                   |
| <b>DOSE30</b>                          | Primary | Intercept   | 6.764 (14.291)  | 0.645                        | 0.822                                 | 0.994                             |
|                                        |         | Slope       | 0.066 (0.031)   | 0.044                        |                                       |                                   |
|                                        | Mets    | Intercept   | 10.805 (10.263) | 0.313                        |                                       |                                   |
|                                        |         | Slope       | 0.066 (0.014)   | <0.0001                      |                                       |                                   |
| <b>Mean Dose</b>                       | Primary | Intercept   | 7.975 (13.703)  | 0.571                        | 0.900                                 | 0.822                             |
|                                        |         | Slope       | 0.073 (0.034)   | 0.042                        |                                       |                                   |
|                                        | Mets    | Intercept   | 10.115 (9.454)  | 0.306                        |                                       |                                   |
|                                        |         | Slope       | 0.082 (0.016)   | <0.0001                      |                                       |                                   |

Supplemental Table 4. Dose-shrinkage (mRECIST) models for primary and metastatic lesions with BED metrics as covariates. Results for RECIST are not shown, but similar to mRECIST the slopes and intercepts of the models for the 2 groups were not significantly different.

| Dose Metric                              | Group   | Coefficient | Estimate (SE)   | p-value for dose - shrinkage | p-value for whether intercepts differ | p-value for whether slopes differ |
|------------------------------------------|---------|-------------|-----------------|------------------------------|---------------------------------------|-----------------------------------|
| <b>EUBED, <math>\alpha=0.0005</math></b> | Primary | Intercept   | 10.416 (12.317) | 0.414                        | 0.982                                 | 0.796                             |
|                                          |         | Slope       | 0.043 (0.019)   | 0.033                        |                                       |                                   |
|                                          | Mets    | Intercept   | 10.789 (9.746)  | 0.290                        |                                       |                                   |
|                                          |         | Slope       | 0.049 (0.010)   | <0.0001                      |                                       |                                   |
| <b>V500</b>                              | Primary | Intercept   | 13.871 (10.635) | 0.217                        | 0.692                                 | 0.152                             |
|                                          |         | Slope       | 0.450 (0.179)   | 0.018                        |                                       |                                   |
|                                          | Mets    | Intercept   | 7.726 (10.771)  | 0.487                        |                                       |                                   |
|                                          |         | Slope       | 0.814 (0.171)   | <0.0001                      |                                       |                                   |
| <b>BED50</b>                             | Primary | Intercept   | 12.222 (12.056) | 0.331                        | 0.799                                 | 0.856                             |
|                                          |         | Slope       | 0.041 (0.019)   | 0.040                        |                                       |                                   |
|                                          | Mets    | Intercept   | 16.367 (10.355) | 0.140                        |                                       |                                   |
|                                          |         | Slope       | 0.045 (0.011)   | 0.0003                       |                                       |                                   |
| <b>Mean BED</b>                          | Primary | Intercept   | 9.963 (12.094)  | 0.426                        | 0.278                                 | 0.260                             |
|                                          |         | Slope       | 0.043 (0.018)   | 0.026                        |                                       |                                   |
|                                          | Mets    | Intercept   | 27.473 (9.559)  | 0.014                        |                                       |                                   |
|                                          |         | Slope       | 0.021 (0.006)   | 0.002                        |                                       |                                   |

Supplemental Table 5. Mean AD and BED metrics for (mRECIST) responding vs. nonresponding lesions. The AD<sub>xx</sub>, BED<sub>xx</sub> and V<sub>xx</sub> values presented are those that provided the best shrinkage model fit.

| <b>Dose Metric</b> | <b>Mean (SD) for Responding lesions</b><br><b>[Min, Max]</b> | <b>Mean (SD) for Nonresponding lesions</b><br><b>[Min, Max]</b> | <b>p-value</b> |
|--------------------|--------------------------------------------------------------|-----------------------------------------------------------------|----------------|
| AD (Gy)            | 559 (291)<br>[90, 1271]                                      | 183 (136)<br>[2, 574]                                           | <0.0001        |
| V500 (AD) (%)      | 50 (31)<br>[0, 98]                                           | 6 (17)<br>[0, 72]                                               | <0.0001        |
| DOSE30 (Gy)        | 665 (341)<br>[98, 1535]                                      | 221 (159)<br>[2, 638]                                           | <0.0001        |
| BED (Gy)           | 1129 (946)<br>[102, 4337]                                    | 255 (210)<br>[2, 809]                                           | <0.0001        |
| V500 (BED) (%)     | 68 (32)<br>[0, 100]                                          | 15 (25)<br>[0, 94]                                              | <0.0001        |
| BED50 (Gy)         | 888 (500)<br>[95, 2085]                                      | 221 (209)<br>[2, 793]                                           | <0.0001        |

Supplemental Table 6. AUC and log likelihood for logit function fits to EUD and EUBED for a range of  $\alpha$  values. Step size was made finer around the optimal  $\alpha$  value.

| $\alpha$      | EUD    |        | EUBED  |        |
|---------------|--------|--------|--------|--------|
|               | AUC    | -2logL | AUC    | -2logL |
| <b>0.0001</b> | 0.8819 | 394.2  | 0.9028 | 397.8  |
| <b>0.0002</b> | 0.8796 | 394.1  | 0.9028 | 396.8  |
| <b>0.0005</b> | 0.8773 | 394.2  | 0.9028 | 396.2  |
| <b>0.0008</b> | 0.8727 | 394.4  | 0.9051 | 396.6  |
| <b>0.001</b>  | 0.8727 | 394.5  | 0.9028 | 396.9  |
| <b>0.002</b>  | 0.8727 | 395.5  | 0.8843 | 398.6  |
| <b>0.005</b>  | 0.8495 | 397.8  | 0.8588 | 401.5  |
| <b>0.008</b>  | 0.8403 | 399.3  | 0.8449 | 402.8  |
| <b>0.01</b>   | 0.8333 | 400.1  | 0.8356 | 403.4  |
| <b>0.1</b>    | 0.787  | 403.6  | 0.7894 | 405    |

Supplemental Table 7. Cell survival TCP model fit AUC and log likelihood for a range of  $\alpha$  values (at optimal N). TCP for each lesion  $j$  in  $k$ th patient was expressed as:  
 $TCP_{jk} = e^{-N \cdot \exp(-\alpha \cdot EUBED_{jk})}$  with N identified as the number of partially controlled tumor sub-volumes. Note that this N is not the clonogen cell number as in the basic Poisson model, because the end point used in the current study is short-duration partial control and not cure. Optimal values of  $\alpha$  and N were estimated using profile likelihood methods as described in the text for the logit model. Comparison of the results below with results of Table 1 of the main text show that in terms of AUC, the logit model performed better.

| $\alpha$      | EUD |       |         | EUBED |       |         |
|---------------|-----|-------|---------|-------|-------|---------|
|               | N   | AUC   | -2logL  | N     | AUC   | -2logL  |
| <b>0.0001</b> | 1   | 0.841 | 67.114  | 1     | 0.861 | 65.208  |
| <b>0.001</b>  | 1   | 0.839 | 56.705  | 1     | 0.868 | 52.6    |
| <b>0.002</b>  | 1   | 0.839 | 53.638  | 2     | 0.851 | 47.411  |
| <b>0.005</b>  | 3   | 0.817 | 47.472  | 3     | 0.824 | 48.486  |
| <b>0.008</b>  | 4   | 0.806 | 50.148  | 5     | 0.808 | 55.62   |
| <b>0.01</b>   | 5   | 0.803 | 53.809  | 6     | 0.799 | 61.554  |
| <b>0.03</b>   | 20  | 0.775 | 104.232 | 23    | 0.768 | 124.875 |
| <b>0.06</b>   | 58  | 0.761 | 185.031 | 64    | 0.761 | 220.028 |
| <b>0.1</b>    | 134 | 0.75  | 292.422 | ---   | ---   | ---     |

\*For EUBED with  $\alpha = 0.1$  model failed to converge and no estimate was identified
